# Supplementary material for: Durable Physiological Changes and Decreased Syncope Burden 12 Months After Unifocal Right-Sided Ablation Under Computed Tomographic Guidance in Patients With Neurally Mediated Syncope or Functional Sinus Node Dysfunction
Source: PubMed Central journal article supplement — Circ Arrhythm Electrophysiol. 2021 May 17;14(6):e009747. doi: 10.1161/CIRCEP.120.009747 (PMC8208097; doi:10.1161/circep.120.009747), 2021-05-17
Supplement: hae-14-e009747-s001.pdf [file hae-14-e009747-s001.pdf]

**Supplemental Material**

**Supplemental Table I. Number of Patients Who Underwent Each Test at Baseline and During Follow-Up**

| <b>Test</b>                            | <b>Baseline</b> | <b>Procedure</b> | <b>Day after procedure</b> | <b>1 Month</b> | <b>6 Months</b> | <b>12 Months</b> |
|----------------------------------------|-----------------|------------------|----------------------------|----------------|-----------------|------------------|
| Electrocardiogram registration         | 50              | 50               | 30                         | 50             | 49              | 46               |
| Atropine challenge                     | 50              | 50               | 26                         | 47             | 45              | 39               |
| 24-h rhythm registration               | 50              | NA               | NA                         | 50             | 48              | 46               |
| Activation map before and after CardNM | NA              | 38               | NA                         | NA             | NA              | NA               |
| Tilt table test in group A             | 31              | NA               | NA                         | 31             | 30              | NA               |
| Exercise test                          | 43              | NA               | NA                         | 37             | NA              | 41               |
| Transthoracic echocardiography         | 50              | NA               | 50                         | NA             | NA              | 49               |

NA indicates non-applicable
